# Supplementary material
Source: publisher figshare collection journal article supplement (https://karger.figshare.com/ndownloader/files/25445147)
Supplement: Supplementary file 1 [file 25445147]

**Figure 2. Comparisons of occupation time (in hours) of operating theatre during the years of this study**

***215 •***

***7 •***

***85***

***109***

***133***

***172***

***162***

***83***

***134***

***50***

* Number of operated patients. Hours reported on y-axis and year of operation reported on axis.
